# Supplementary material for: MCHM acts as a hydrotrope, altering the balance of metals in yeast
Source: bioRxiv or medRxiv preprint supplement (doi:10.1101/606426), 2019-06-07
Supplement: Supplementary file [file media-1.pdf]

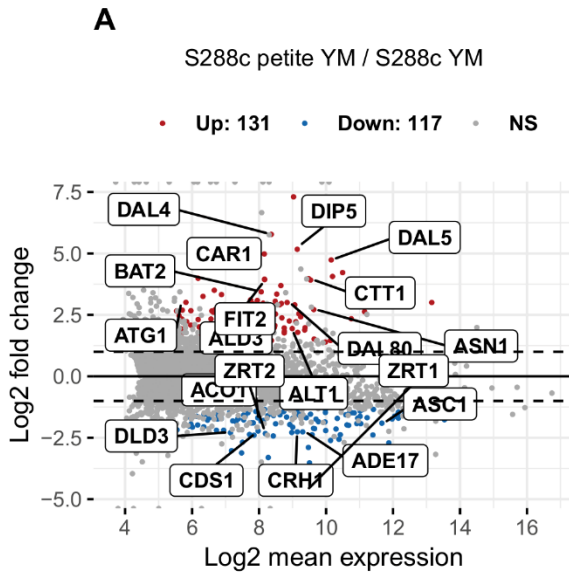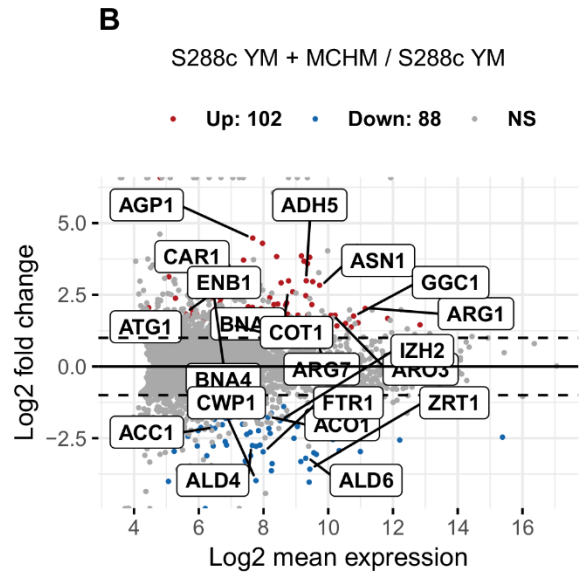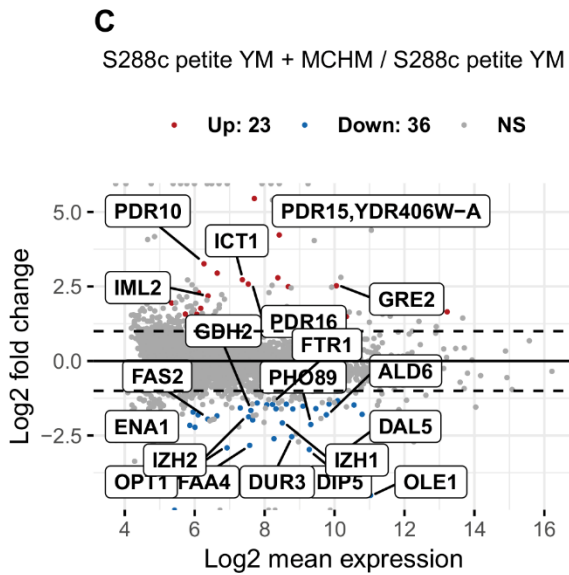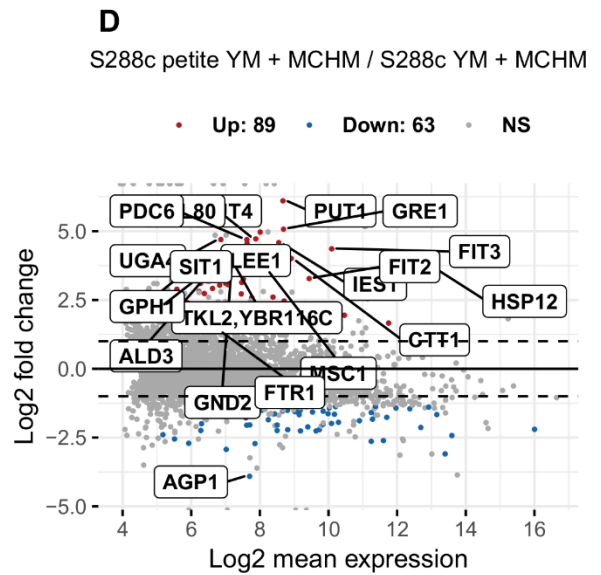

Supplemental Figure 1 Pupo 2018

## Up-regulated Genes

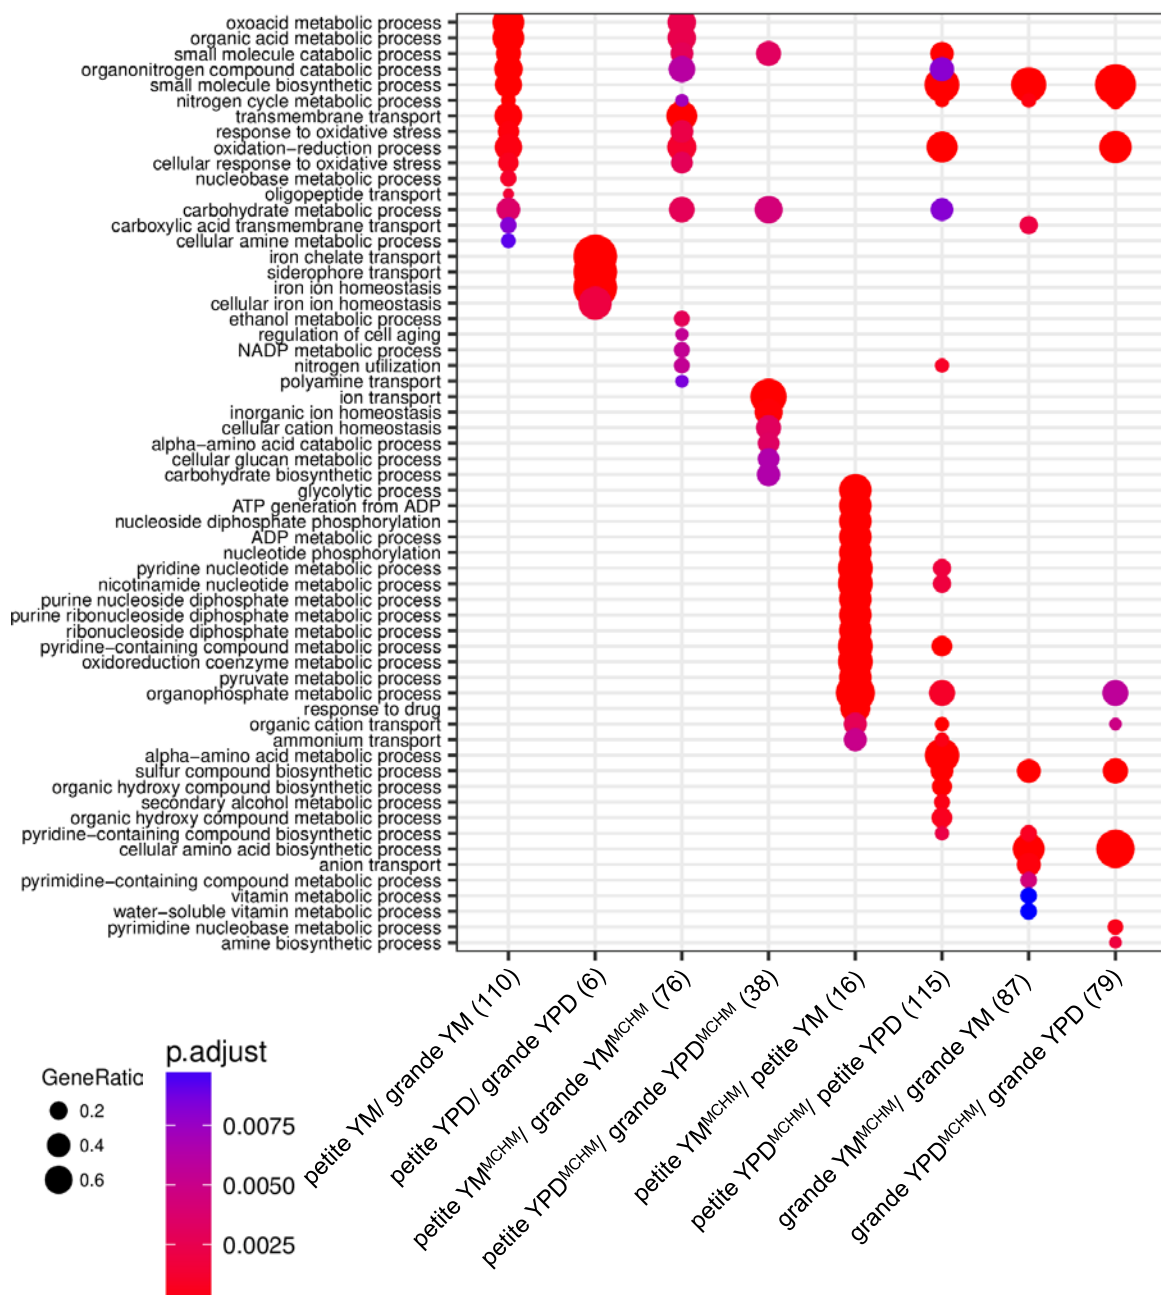

Supplemental Figure 2 Pupo 2018

## Down-regulated Genes

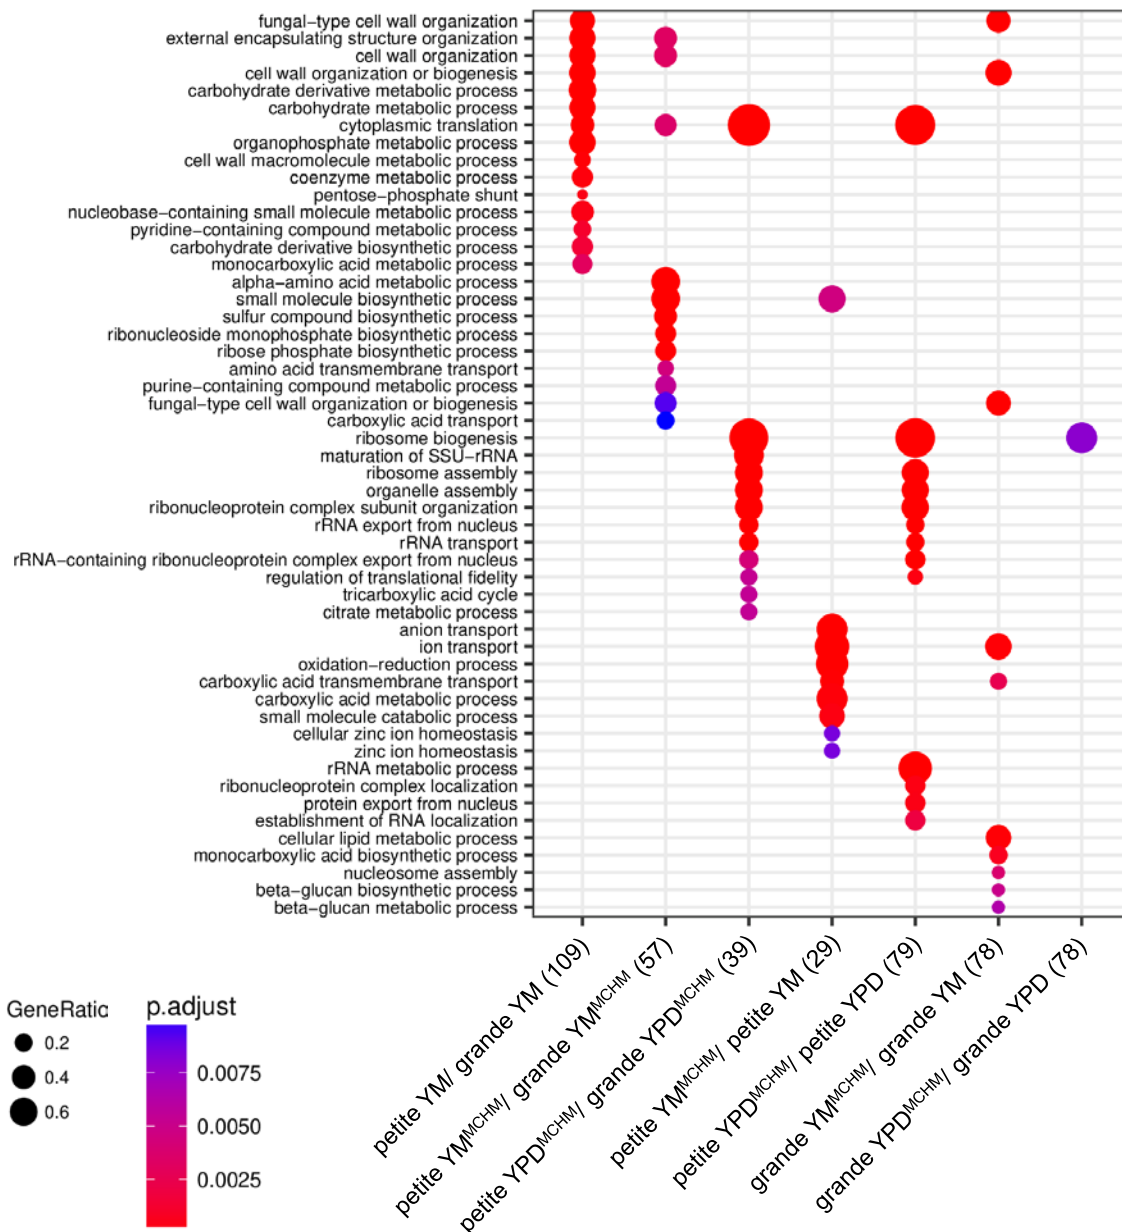

Supplemental Figure 3 Pupo 2018

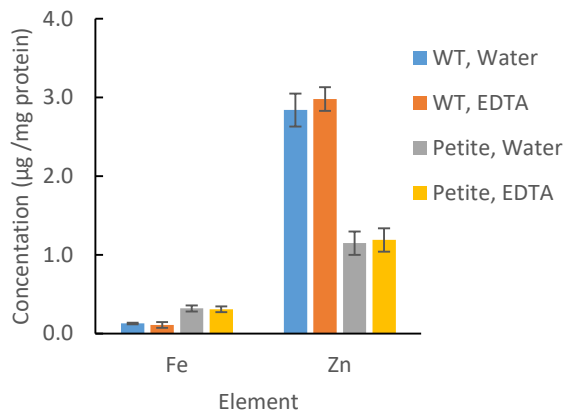

**Supplemental Figure 4 Pupo 2018**

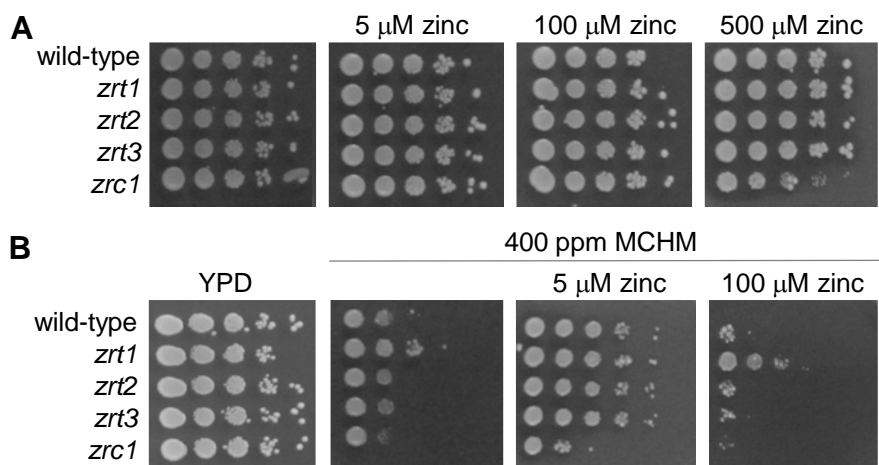

**Supplemental Figure 5 Pupo 2018**

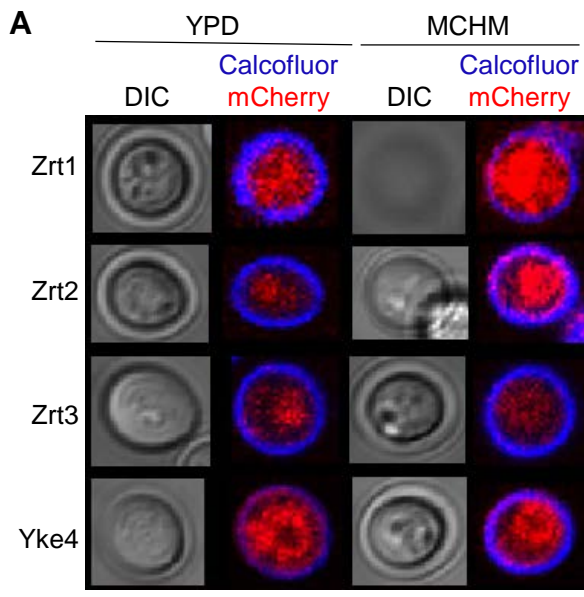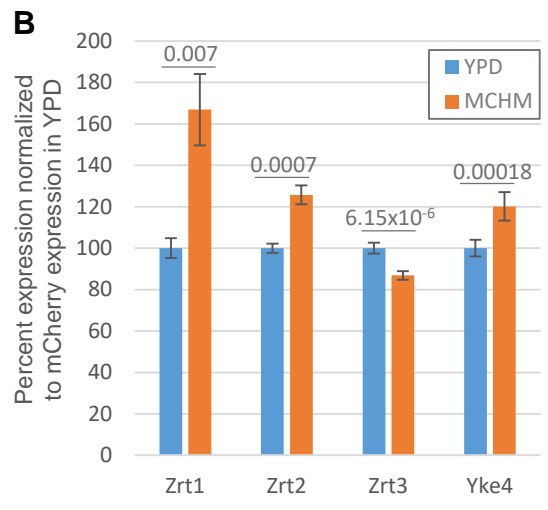

Supplemental Figure 6 Pupo 2018
